# Supplementary material for: Combination of phenotype and polygenic risk score in breast cancer risk evaluation in the Spanish population: a case –control study
Source: Springer Nature journal article supplement (doi:10.1186/s12885-020-07584-9), 2020-11-09
Supplement: MOESM1 [file 18573128]

**Supplementary Table S1.**

|    | <b>SNPs</b> | <b>MAF</b> | <b>Alleles</b> | <b>OR</b> |
|----|-------------|------------|----------------|-----------|
| 1  | rs10069690  | 0.276      | C/T            | 1.06      |
| 2  | rs1045485   | 0.15       | G/C            | 0.88      |
| 3  | rs10472076  | 0.36       | T/C            | 1.03      |
| 4  | rs10474352  | 0.159      | C/T            | 0.94      |
| 5  | rs10771399  | 0.145      | A/G            | 0.79      |
| 6  | rs10816625  | 0.103      | A/G            | 1.11      |
| 7  | rs10931936  | 0.224      | C/T            | 0.88      |
| 8  | rs10941679  | 0.248      | A/G            | 1.15      |
| 9  | rs10995190  | 0.192      | G/A            | 0.86      |
| 10 | rs10995201  | 0.187      | A/G            | 0.9       |
| 11 | rs11199914  | 0.299      | C/T            | 0.96      |
| 12 | rs11249433  | 0.5        | A/G            | 1.11      |
| 13 | rs113577745 | 0.093      | C/G            | 1.08      |
| 14 | rs11552449  | 0.21       | C/T            | 1.04      |
| 15 | rs11571833  | 0.014      | A/T            | 1.35      |
| 16 | rs11814448  | 0.028      | A/C            | 1.12      |
| 17 | rs11820646  | 0.402      | C/T            | 0.96      |
| 18 | rs11977670  | 0.355      | G/A            | 1.06      |
| 19 | rs12422552  | 0.313      | G/C            | 1.06      |
| 20 | rs12443621  | 0.504      | A/G            | 1.11      |
| 21 | rs12710696  | 0.308      | C/T            | 1.03      |
| 22 | rs1292011   | 0.416      | A/G            | 0.92      |
| 23 | rs13066793  | 0.107      | A/G            | 0.94      |
| 24 | rs13281615  | 0.486      | A/G            | 1.11      |
| 25 | rs13294895  | 0.178      | C/T            | 1.06      |
| 26 | rs13329835  | 0.178      | A/G            | 1.07      |
| 27 | rs13365225  | 0.145      | A/G            | 0.91      |
| 28 | rs13387042  | 0.537      | G/A            | 1.2       |
| 29 | rs1353747   | 0.075      | T/G            | 0.96      |
| 30 | rs1432679   | 0.509      | T/C            | 1.08      |
| 31 | rs1550623   | 0.187      | A/G            | 0.94      |
| 32 | rs16857609  | 0.248      | C/T            | 1.06      |
| 33 | rs16991615  | 0.079      | G/A            | 1.1       |
| 34 | rs17356907  | 0.285      | A/G            | 0.91      |
| 35 | rs17817449  | 0.374      | T/G            | 0.95      |
| 36 | rs1895062   | 0.481      | A/G            | 0.94      |
| 37 | rs204247    | 0.444      | A/G            | 1.04      |
| 38 | rs2046210   | 0.397      | G/A            | 1.11      |
| 39 | rs2236007   | 0.252      | G/A            | 0.93      |
| 40 | rs2290203   | 0.215      | G/A            | 0.94      |
| 41 | rs2363956   | 0.463      | G/T            | 1.19      |

|    |            |       |      |      |
|----|------------|-------|------|------|
| 42 | rs2588809  | 0.243 | C/T  | 1.06 |
| 43 | rs2747652  | 0.477 | C/T  | 0.94 |
| 44 | rs2823093  | 0.243 | G/A  | 0.94 |
| 45 | rs2943559  | 0.093 | A/G  | 1.1  |
| 46 | rs2981579  | 0.397 | G/A  | 1.43 |
| 47 | rs2992756  | 0.518 | C/T  | 1.06 |
| 48 | rs3757322  | 0.369 | T/G  | 1.08 |
| 49 | rs3760982  | 0.495 | G/A  | 1.05 |
| 50 | rs3803662  | 0.252 | G/A  | 1.2  |
| 51 | rs3903072  | 0.435 | G/T  | 0.97 |
| 52 | rs4442975  | 0.481 | G/T  | 0.89 |
| 53 | rs45631563 | 0.042 | A/T  | 0.81 |
| 54 | rs4784227  | 0.238 | C/T  | 1.23 |
| 55 | rs4808801  | 0.336 | A/G) | 0.93 |
| 56 | rs4849887  | 0.15  | C/T  | 0.91 |
| 57 | rs4973768  | 0.551 | C/T  | 1.11 |
| 58 | rs554219   | 0.141 | C/G  | 1.21 |
| 59 | rs58058861 | 0.117 | G/A  | 1.06 |
| 60 | rs58847541 | 0.159 | G/A  | 1.08 |
| 61 | rs6001930  | 0.103 | T/C  | 1.12 |
| 62 | rs614367   | 0.146 | C/T  | 1.15 |
| 63 | rs616488   | 0.322 | A/G  | 0.94 |
| 64 | rs6472903  | 0.145 | T/G  | 0.94 |
| 65 | rs6504950  | 0.252 | G/A  | 0.95 |
| 66 | rs6507583  | 0.084 | A/G  | 0.92 |
| 67 | rs6762644  | 0.313 | A/G  | 1.05 |
| 68 | rs6815814  | 0.444 | A/C  | 1.06 |
| 69 | rs6828523  | 0.084 | C/A  | 0.91 |
| 70 | rs704010   | 0.453 | C/T  | 1.07 |
| 71 | rs7072776  | 0.308 | G/A  | 1.05 |
| 72 | rs720475   | 0.304 | G/A  | 0.96 |
| 73 | rs72749841 | 0.243 | T/C  | 0.93 |
| 74 | rs72755295 | 0.028 | A/G  | 1.15 |
| 75 | rs72826962 | 0.014 | C/T  | 1.2  |
| 76 | rs7297051  | 0.234 | C/T  | 0.89 |
| 77 | rs73161324 | 0.033 | C/T  | 1.06 |
| 78 | rs7529522  | 0.313 | T/C  | 1.06 |
| 79 | rs75915166 | 0.061 | C/A  | 1.28 |
| 80 | rs78269692 | 0.056 | T/C  | 1.09 |
| 81 | rs8009944  | 0.262 | A/C  | 0.88 |
| 82 | rs8170     | 0.14  | G/A  | 1.26 |
| 83 | rs865686   | 0.388 | T/G  | 0.89 |
| 84 | rs889312   | 0.248 | A/C  | 1.13 |

|    |           |       |     |      |
|----|-----------|-------|-----|------|
| 85 | rs909116  | 0.486 | C/T | 1.17 |
| 86 | rs9397437 | 0.089 | G/A | 1.17 |
| 87 | rs941764  | 0.383 | A/G | 1.03 |
| 88 | rs9693444 | 0.364 | C/A | 1.06 |
| 89 | rs9790517 | 0.192 | C/T | 1.04 |
| 90 | rs9790879 | 0.388 | T/C | 1.1  |
| 91 | rs9833888 | 0.215 | G/T | 1.06 |
| 92 | rs527616  | 0.369 | G/C | 0.97 |
